# Supplementary material for: Comparing Farm Biosecurity and Antimicrobial Use in High-Antimicrobial-Consuming Broiler and Pig Farms in the Belgian–Dutch Border Region
Source: PubMed Central journal article supplement (PMC7673451; doi:10.3389/fvets.2020.558455), 2020-10-30
Supplement: Data_Sheet_1.pdf [file Data_Sheet_1.pdf]

## *Supplementary Material*

*Supplementary Table 1 Antimicrobial use data from the performed study (expressed in Treatment Incidence, TI) with reference values per country for the different animal categories (2018). A comparison within the category of the sows and suckling piglets was not possible due to major adjustments in the calculation of antimicrobial use for this animal category in the manuscript, which made comparison impossible. This table indicates that we have selected high antimicrobial consuming farms in this study.*

|                  |                              | <b>Study mean</b> | <i>Reference mean</i> | <b>Study median</b> | <i>Reference median</i> |
|------------------|------------------------------|-------------------|-----------------------|---------------------|-------------------------|
| <b>Broilers</b>  | Belgium <sup>1</sup>         | 10                | 7.2                   | 8                   | 5.4                     |
|                  | the Netherlands <sup>2</sup> | 6                 | 3.9                   | 3                   | 2.8                     |
| <b>Weaners</b>   | Belgium <sup>1</sup>         | 46                | 27.5                  | 45                  | 16.6                    |
|                  | the Netherlands <sup>2</sup> | 16                | 5.4                   | 14                  | 2.8                     |
| <b>Finishers</b> | Belgium <sup>1</sup>         | 6                 | 4.4                   | 5                   | 2.8                     |
|                  | the Netherlands <sup>2</sup> | 1                 | 1.1                   | 1                   | 0.5                     |

<sup>1</sup>Reference values for Belgium were retrieved from the national data collection system Sanitel-Med, with calculations done by AMCRA (Centre of expertise on antimicrobial use and resistance in animals) (38).

<sup>2</sup>Reference data for the Netherlands was retrieved from the SDA's (Netherlands Veterinary Medicines Institute) annual report on "usage of antibiotics in agricultural livestock in the Netherlands in 2018" (39) and recalculated to 100 days.

Supplementary Table 2 Biosecurity scores (0 to 100) of the participating broiler farms for the Netherlands (n=13) and Belgium (n=15) after completion of the Biocheck.UGent™ questionnaire. The higher the score, the more biosecurity measures were at place.

|                                         | the Netherlands |           |           |           |           |           |           |           |           |           |           |           |           | Belgium   |           |           |           |           |           |           |           |           |           |           |           |           |           |           |
|-----------------------------------------|-----------------|-----------|-----------|-----------|-----------|-----------|-----------|-----------|-----------|-----------|-----------|-----------|-----------|-----------|-----------|-----------|-----------|-----------|-----------|-----------|-----------|-----------|-----------|-----------|-----------|-----------|-----------|-----------|
| Farmnumber                              | 1               | 2         | 3         | 4         | 5         | 6         | 7         | 8         | 9         | 11        | 12        | 14        | 15        | 1         | 2         | 3         | 4         | 5         | 6         | 7         | 8         | 9         | 10        | 11        | 12        | 13        | 14        | 15        |
| <b>Total external biosecurity</b>       | <b>75</b>       | <b>66</b> | <b>63</b> | <b>66</b> | <b>62</b> | <b>60</b> | <b>66</b> | <b>79</b> | <b>77</b> | <b>77</b> | <b>78</b> | <b>76</b> | <b>71</b> | <b>57</b> | <b>67</b> | <b>63</b> | <b>65</b> | <b>51</b> | <b>56</b> | <b>59</b> | <b>59</b> | <b>61</b> | <b>67</b> | <b>67</b> | <b>75</b> | <b>57</b> | <b>52</b> | <b>68</b> |
| Purchase one-day-old chicks             | 79              | 79        | 79        | 48        | 30        | 59        | 79        | 58        | 79        | 79        | 79        | 79        | 59        | 79        | 90        | 79        | 79        | 9         | 79        | 58        | 79        | 79        | 79        | 79        | 37        | 30        | 79        |           |
| Depopulation broilers                   | 78              | 71        | 51        | 71        | 51        | 65        | 71        | 71        | 64        | 65        | 71        | 71        | 77        | 51        | 59        | 71        | 51        | 61        | 44        | 44        | 61        | 51        | 71        | 71        | 71        | 64        | 15        | 64        |
| Feed and water                          | 67              | 48        | 48        | 62        | 66        | 48        | 48        | 87        | 87        | 43        | 47        | 43        | 48        | 33        | 47        | 48        | 44        | 44        | 48        | 48        | 44        | 44        | 44        | 44        | 44        | 36        | 44        | 48        |
| Removal manure & carcasses              | 73              | 66        | 88        | 77        | 66        | 78        | 53        | 88        | 88        | 88        | 88        | 88        | 77        | 53        | 63        | 53        | 52        | 48        | 63        | 53        | 77        | 62        | 77        | 63        | 63        | 77        | 63        | 66        |
| Visitors and farmworkers                | 70              | 59        | 61        | 76        | 76        | 67        | 76        | 90        | 90        | 96        | 96        | 96        | 90        | 47        | 70        | 56        | 84        | 64        | 47        | 56        | 76        | 56        | 70        | 61        | 90        | 56        | 64        | 70        |
| Material supply                         | 100             | 44        | 44        | 56        | 56        | 0         | 56        | 56        | 56        | 56        | 56        | 56        | 56        | 44        | 56        | 44        | 56        | 56        | 44        | 44        | 0         | 56        | 56        | 56        | 100       | 44        | 56        | 56        |
| Infrastructure and biological vectors   | 89              | 97        | 93        | 87        | 65        | 93        | 94        | 94        | 90        | 97        | 94        | 93        | 82        | 80        | 79        | 90        | 69        | 65        | 77        | 94        | 72        | 76        | 81        | 76        | 83        | 58        | 78        | 86        |
| Location farm                           | 42              | 48        | 30        | 30        | 81        | 44        | 30        | 81        | 48        | 81        | 81        | 67        | 63        | 63        | 63        | 44        | 81        | 44        | 44        | 63        | 44        | 63        | 44        | 81        | 63        | 81        | 67        | 63        |
| <b>Total internal biosecurity</b>       | <b>75</b>       | <b>69</b> | <b>61</b> | <b>66</b> | <b>51</b> | <b>63</b> | <b>55</b> | <b>75</b> | <b>68</b> | <b>65</b> | <b>73</b> | <b>73</b> | <b>65</b> | <b>54</b> | <b>74</b> | <b>54</b> | <b>57</b> | <b>41</b> | <b>51</b> | <b>43</b> | <b>55</b> | <b>45</b> | <b>45</b> | <b>63</b> | <b>62</b> | <b>74</b> | <b>42</b> | <b>57</b> |
| Disease management                      | 79              | 60        | 60        | 79        | 81        | 81        | 79        | 79        | 81        | 81        | 81        | 81        | 81        | 56        | 60        | 58        | 79        | 79        | 56        | 37        | 60        | 60        | 60        | 77        | 79        | 79        | 79        | 79        |
| Cleaning and disinfection               | 59              | 55        | 50        | 62        | 55        | 68        | 37        | 68        | 67        | 63        | 62        | 63        | 58        | 65        | 70        | 65        | 55        | 18        | 58        | 54        | 48        | 41        | 41        | 71        | 50        | 66        | 35        | 38        |
| Materials and measures btw compartments | 100             | 82        | 82        | 53        | 0         | 29        | 53        | 82        | 53        | 53        | 82        | 82        | 53        | 29        | 100       | 29        | 29        | 29        | 29        | 29        | 59        | 29        | 29        | 29        | 59        | 82        | 0         | 59        |
| <b>Total overall biosecurity</b>        | <b>75</b>       | <b>67</b> | <b>62</b> | <b>66</b> | <b>58</b> | <b>61</b> | <b>63</b> | <b>78</b> | <b>74</b> | <b>73</b> | <b>77</b> | <b>75</b> | <b>69</b> | <b>56</b> | <b>69</b> | <b>60</b> | <b>63</b> | <b>48</b> | <b>54</b> | <b>54</b> | <b>58</b> | <b>56</b> | <b>60</b> | <b>66</b> | <b>71</b> | <b>62</b> | <b>49</b> | <b>64</b> |

Broiler farms 10 and 13 in the Netherlands withdrew from the project and were not replaced.

Supplementary Table 3 Biosecurity scores (0 to 100) of the participating pig farms for the Netherlands (n=15) and Belgium (n=14) after completion of the Biocheck.UGent™ questionnaire. The higher the score, the more biosecurity measures are at place.

|                                                        | the Netherlands |           |           |           |           |           |           |           |           |           |           |           |           |           |           | Belgium   |           |           |           |           |           |           |           |           |           |           |           |           |           |  |
|--------------------------------------------------------|-----------------|-----------|-----------|-----------|-----------|-----------|-----------|-----------|-----------|-----------|-----------|-----------|-----------|-----------|-----------|-----------|-----------|-----------|-----------|-----------|-----------|-----------|-----------|-----------|-----------|-----------|-----------|-----------|-----------|--|
| Farmnumber                                             | 1               | 2         | 3         | 4         | 5         | 6         | 7         | 8         | 9         | 10        | 11        | 12        | 13        | 14        | 15        | 1         | 2         | 3         | 4         | 5         | 6         | 7         | 8         | 9         | 10        | 11        | 12        | 14        | 15        |  |
| <b>Total external biosecurity</b>                      | <b>71</b>       | <b>75</b> | <b>71</b> | <b>82</b> | <b>61</b> | <b>78</b> | <b>73</b> | <b>78</b> | <b>81</b> | <b>67</b> | <b>73</b> | <b>84</b> | <b>74</b> | <b>80</b> | <b>64</b> | <b>64</b> | <b>64</b> | <b>61</b> | <b>68</b> | <b>54</b> | <b>59</b> | <b>58</b> | <b>74</b> | <b>59</b> | <b>65</b> | <b>52</b> | <b>47</b> | <b>54</b> | <b>56</b> |  |
| Purchase pigs and semen                                | 88              | 88        | 76        | 88        | 48        | 88        | 88        | 88        | 84        | 82        | 74        | 88        | 78        | 88        | 82        | 76        | 74        | 56        | 88        | 88        | 88        | 100       | 86        | 88        | 88        | 88        | 76        | 56        | 88        |  |
| Feed, water and equipment supply                       | 37              | 53        | 53        | 43        | 43        | 53        | 47        | 53        | 53        | 37        | 37        | 53        | 63        | 73        | 43        | 53        | 37        | 27        | 43        | 17        | 10        | 27        | 53        | 27        | 17        | 17        | 17        | 27        | 37        |  |
| Removal animals, manure, carcasses                     | 72              | 52        | 74        | 83        | 83        | 74        | 83        | 78        | 83        | 52        | 78        | 83        | 87        | 83        | 43        | 74        | 70        | 83        | 78        | 54        | 67        | 74        | 63        | 63        | 83        | 39        | 46        | 70        | 39        |  |
| Visitors and farmworkers                               | 88              | 76        | 88        | 88        | 76        | 88        | 100       | 88        | 88        | 76        | 76        | 88        | 88        | 88        | 53        | 59        | 65        | 47        | 65        | 53        | 53        | 35        | 82        | 47        | 53        | 35        | 35        | 47        | 65        |  |
| Vermin and bird control                                | 100             | 100       | 100       | 100       | 70        | 60        | 80        | 100       | 80        | 100       | 100       | 100       | 100       | 100       | 100       | 40        | 80        | 60        | 70        | 50        | 60        | 40        | 90        | 60        | 60        | 60        | 50        | 50        | 50        |  |
| Location farm                                          | 20              | 100       | 20        | 100       | 40        | 100       | 0         | 50        | 100       | 60        | 80        | 100       | 0         | 30        | 80        | 60        | 50        | 100       | 30        | 30        | 50        | 20        | 70        | 40        | 70        | 60        | 40        | 70        | 30        |  |
| <b>Total internal biosecurity</b>                      | <b>56</b>       | <b>75</b> | <b>78</b> | <b>73</b> | <b>45</b> | <b>52</b> | <b>92</b> | <b>69</b> | <b>77</b> | <b>67</b> | <b>56</b> | <b>79</b> | <b>87</b> | <b>90</b> | <b>62</b> | <b>60</b> | <b>54</b> | <b>29</b> | <b>72</b> | <b>42</b> | <b>38</b> | <b>51</b> | <b>58</b> | <b>54</b> | <b>47</b> | <b>41</b> | <b>24</b> | <b>45</b> | <b>35</b> |  |
| Disease management                                     | 80              | 80        | 100       | 40        | 80        | 40        | 100       | 40        | 100       | 80        | 80        | 100       | 60        | 80        | 80        | 20        | 20        | 20        | 20        | 20        | 40        | 40        | 100       | 60        | 40        | 40        | 40        | 40        | 40        |  |
| Cleaning and disinfection                              | 30              | 85        | 60        | 98        | 50        | 40        | 85        | 95        | 95        | 85        | 65        | 95        | 95        | 95        | 85        | 65        | 75        | 30        | 75        | 65        | 10        | 50        | 30        | 45        | 10        | 40        | 20        | 50        | 20        |  |
| Measures btw compartments, working lines and equipment | 57              | 61        | 82        | 100       | 61        | 36        | 100       | 61        | 96        | 86        | 61        | 64        | 89        | 96        | 32        | 54        | 46        | 29        | 93        | 21        | 29        | 32        | 61        | 36        | 36        | 11        | 7         | 32        | 21        |  |
| Farrowing and suckling period                          | 29              | 50        | 50        | 43        | 14        | 64        | 64        | 50        | 21        | 36        | 36        | 50        | 86        | 86        | 71        | 64        | 21        | 43        | 14        | 36        | 29        | 36        | 36        | 36        | 64        | 71        | 29        | 21        | 71        |  |
| Nursery unit                                           | 64              | 86        | 86        | 50        | 36        | 64        | 100       | 64        | 50        | 64        | 36        | 86        | 86        | 100       | 64        | 71        | 57        | 21        | 100       | 71        | 50        | 71        | 86        | 100       | 64        | 36        | 50        | 71        | 43        |  |
| Finishing unit                                         | 93              | 100       | 100       | 57        | 21        | 86        | 100       | 93        | NA        | 29        | NA        | 93        | 93        | 71        | NA        | 79        | 93        | NA        | 93        | NA        | 93        | 93        | 57        | 71        | 93        | 79        | 21        | 64        | 36        |  |
| <b>Total overall biosecurity</b>                       | <b>64</b>       | <b>75</b> | <b>75</b> | <b>78</b> | <b>53</b> | <b>65</b> | <b>83</b> | <b>74</b> | <b>79</b> | <b>67</b> | <b>65</b> | <b>82</b> | <b>81</b> | <b>85</b> | <b>63</b> | <b>62</b> | <b>59</b> | <b>45</b> | <b>70</b> | <b>48</b> | <b>49</b> | <b>55</b> | <b>66</b> | <b>57</b> | <b>56</b> | <b>47</b> | <b>36</b> | <b>50</b> | <b>46</b> |  |

Pig farm 13 in Belgium withdrew from the project and was not replaced.

NA = not applicable

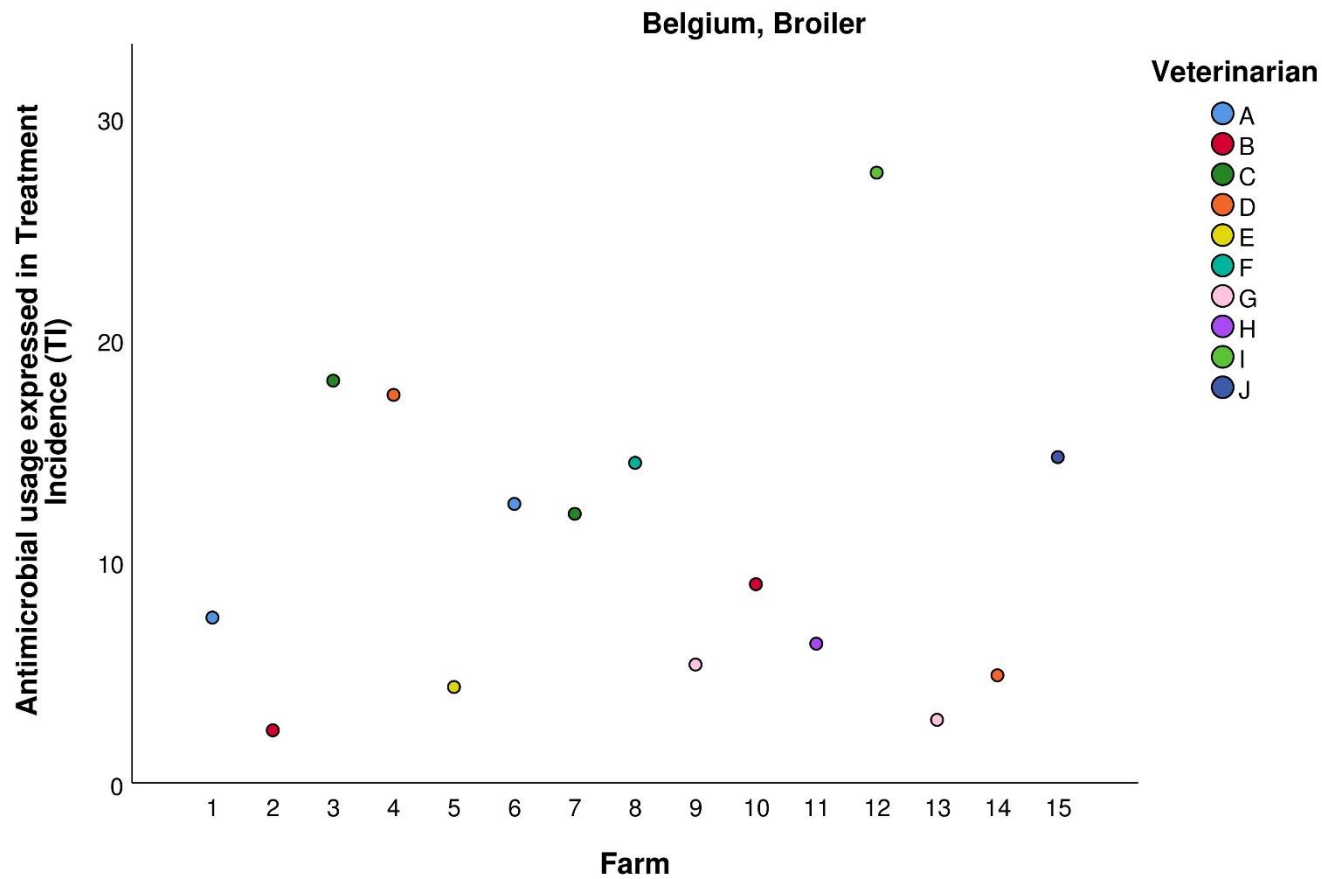

*Supplementary Figure 1 Antimicrobial use of each participating broiler farms in Belgium (n=15). Antimicrobial use is expressed in Treatment Incidence (TI) on 100 days, the number of days an animal was treated with antimicrobials out of 100 days. The different colors represent the different veterinarians involved in this study.*

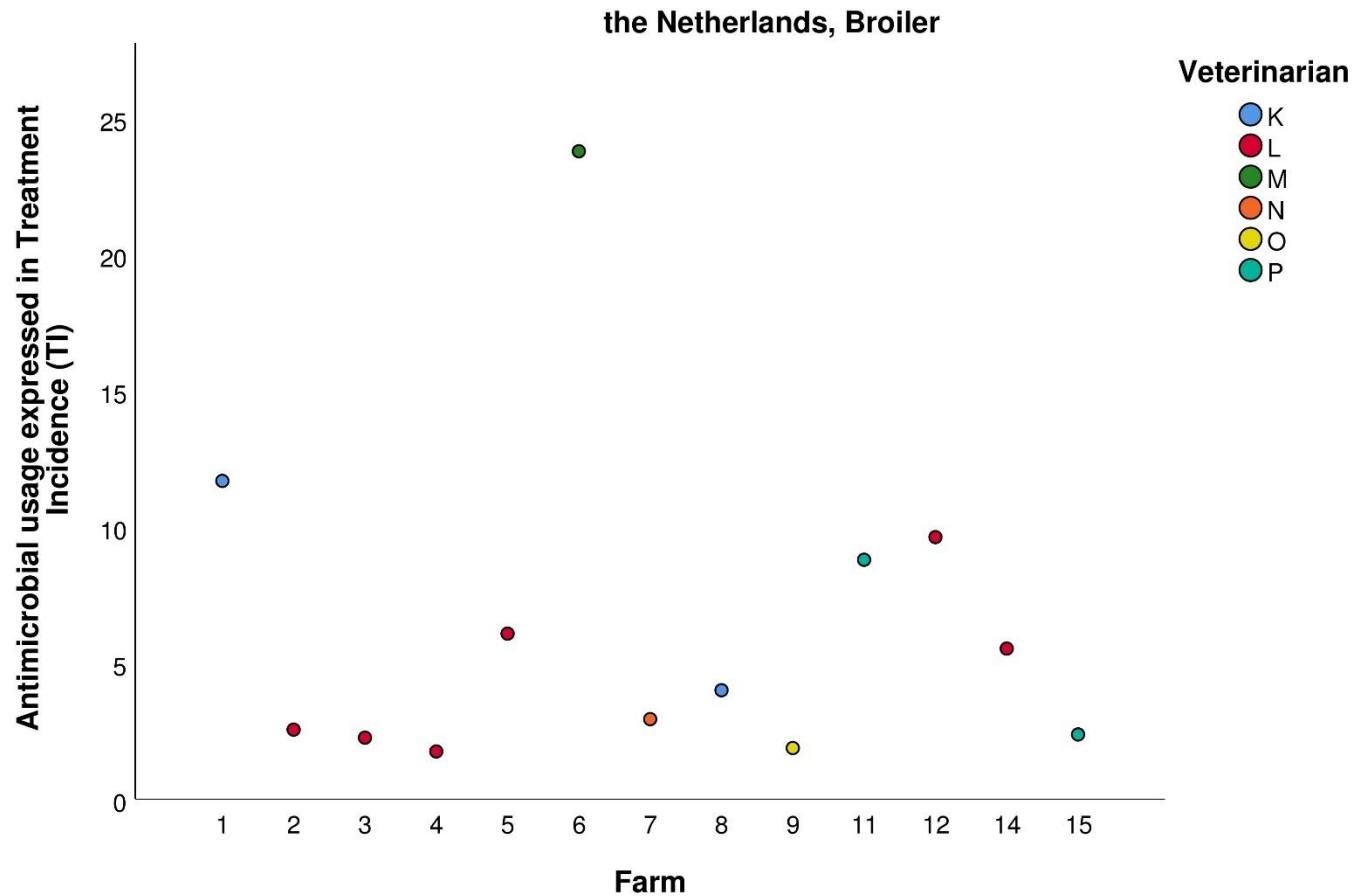

*Supplementary Figure 2 Antimicrobial use of each participating broiler farms in the Netherlands (n=13). Antimicrobial use is expressed in Treatment Incidence (TI) on 100 days, the number of days an animal was treated with antimicrobials out of 100 days. The different colors represent the different veterinarians involved in this study. Farms 10 and 13 withdrew from the project and were not replaced.*

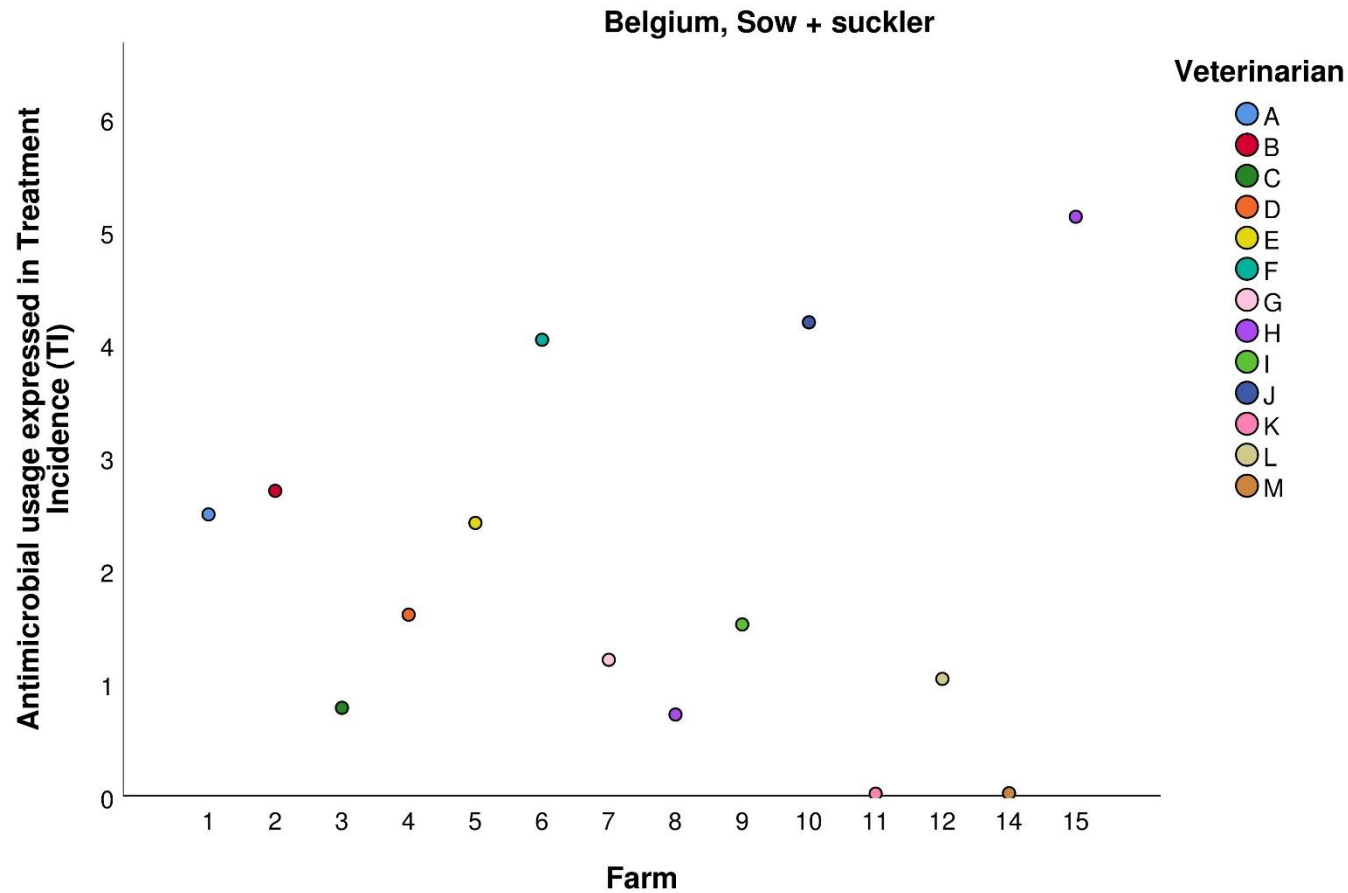

*Supplementary Figure 3 Antimicrobial use of each participating pig farm in Belgium (n=14) for the animal category of the sows and suckling piglets. Antimicrobial use is expressed in Treatment Incidence (TI) on 100 days, the number of days an animal was treated with antimicrobials out of 100 days. The different colors represent the different veterinarians involved in this study. Farm 13 withdrew from the project and was not replaced.*

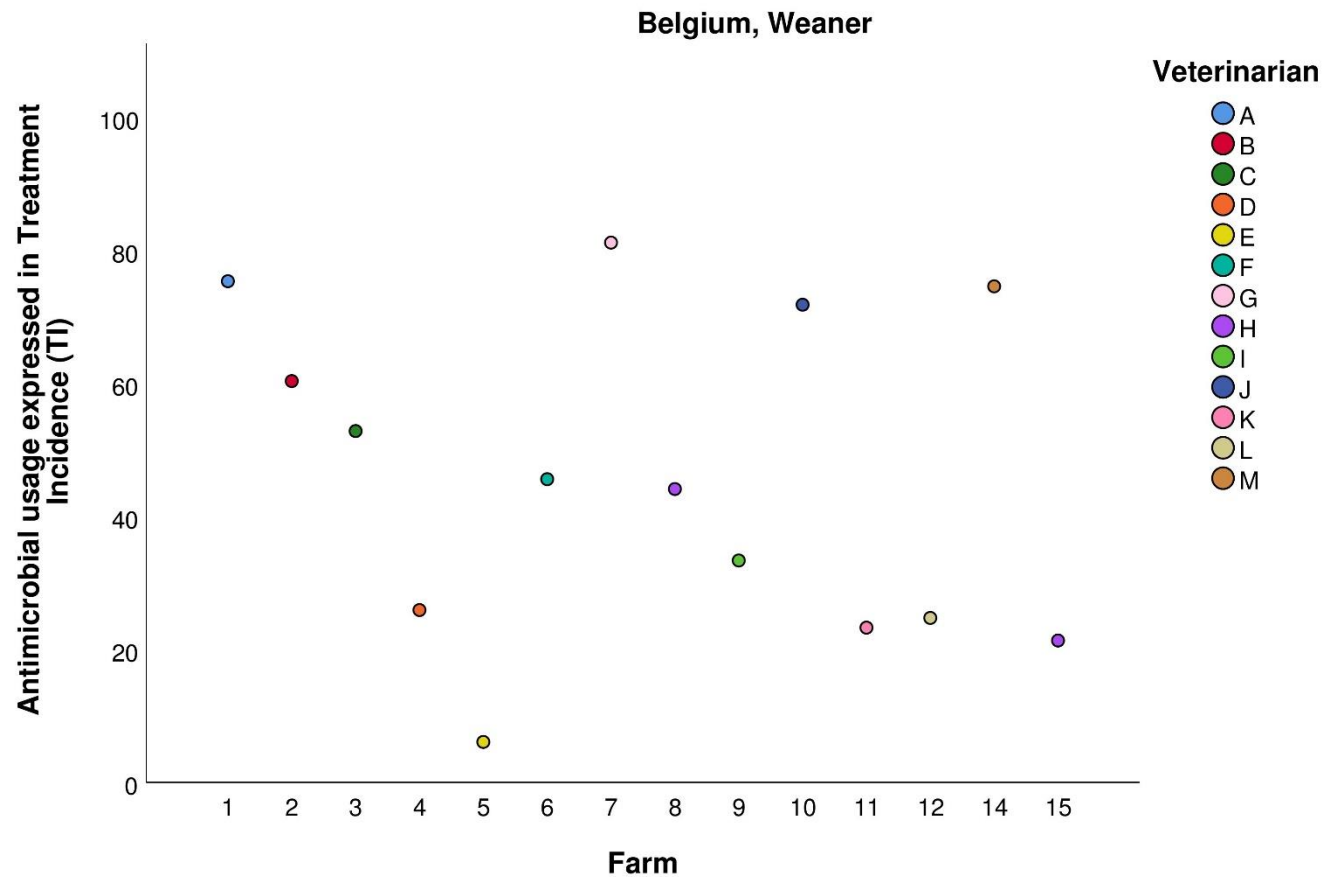

*Supplementary Figure 4 Antimicrobial use of each participating pig farm in Belgium (n=14) for the animal category of the weaners. Antimicrobial use is expressed in Treatment Incidence (TI) on 100 days, the number of days an animal was treated with antimicrobials out of 100 days. The different colors represent the different veterinarians involved in this study. Farm 13 withdrew from the project and was not replaced.*

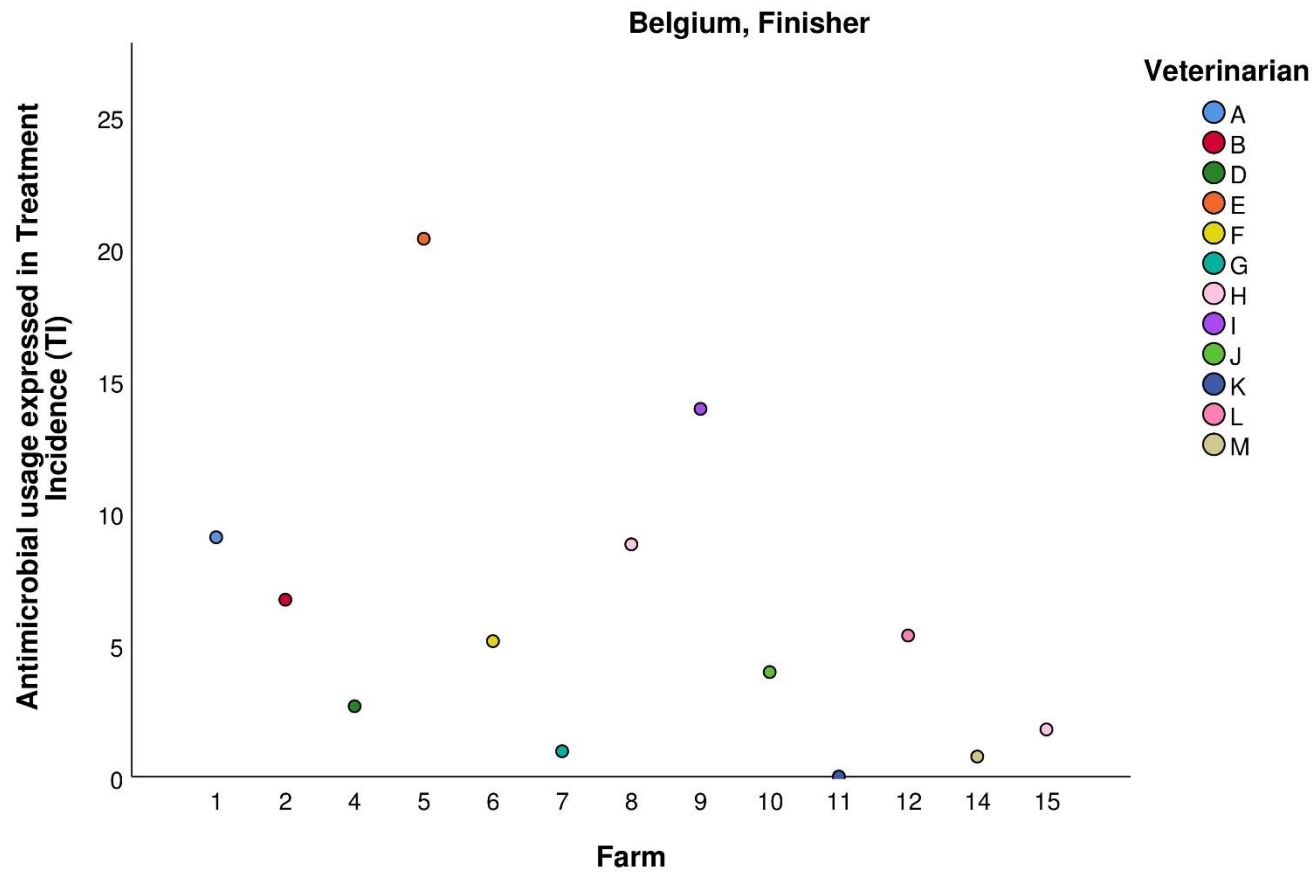

*Supplementary Figure 5 Antimicrobial use of each participating pig farm in Belgium (n=14) for the animal category of the finishers. Antimicrobial use is expressed in Treatment Incidence (TI) on 100 days, the number of days an animal was treated with antimicrobials out of 100 days. The different colors represent the different veterinarians involved in this study. Farm 13 withdrew from the project and was not replaced. Farm 3 had no finishers.*



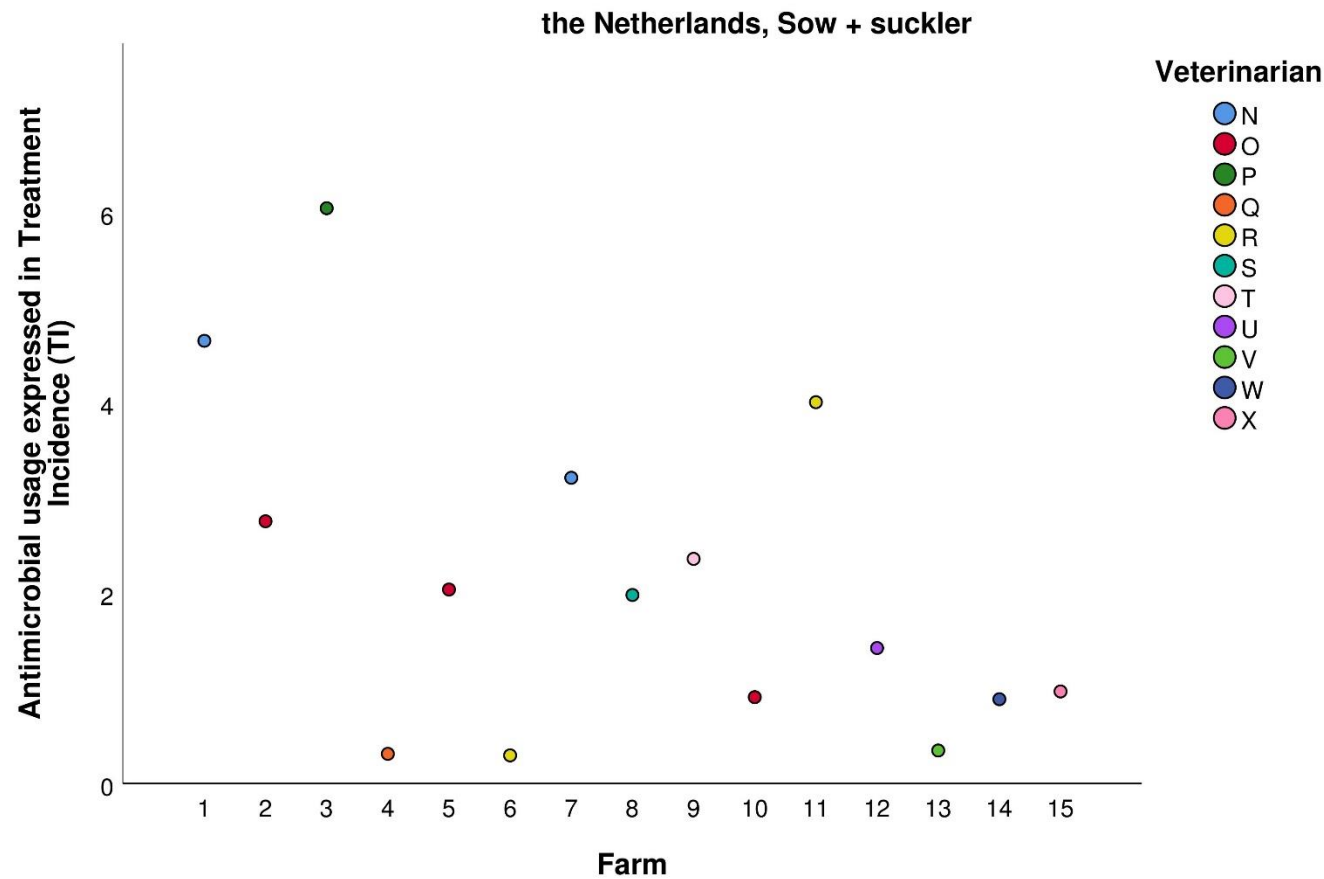

Supplementary Figure 6 Antimicrobial use of each participating pig farm in the Netherlands ( $n=15$ ) for the animal category of the sows and suckling piglets. Antimicrobial use is expressed in Treatment Incidence (TI) on 100 days, the number of days an animal was treated with antimicrobials out of 100 days. The different colors represent the different veterinarians involved in this study.

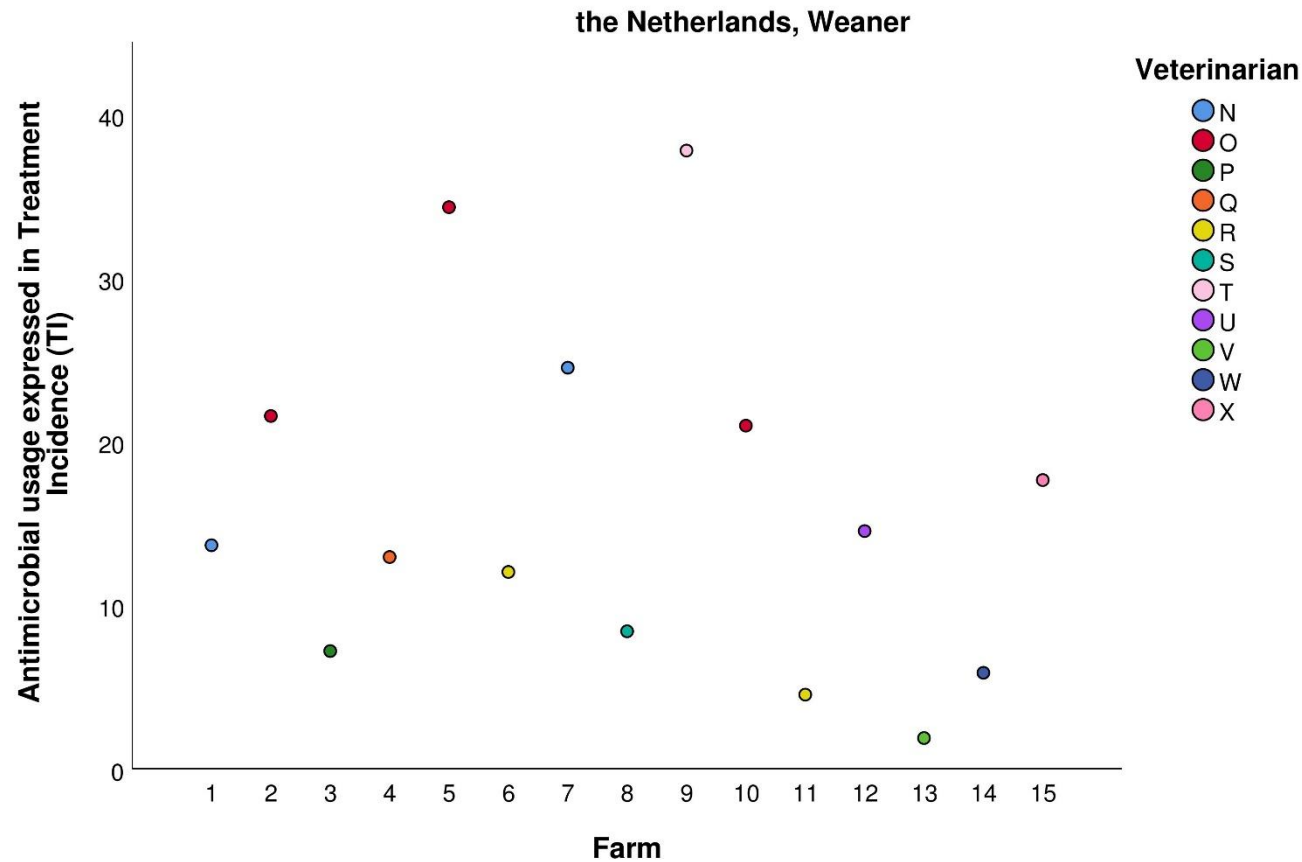

*Supplementary Figure 7 Antimicrobial use of each participating pig farm in the Netherlands (n=15) for the animal category of the weaners. Antimicrobial use is expressed in Treatment Incidence (TI) on 100 days, the number of days an animal was treated with antimicrobials out of 100 days. The different colors represent the different veterinarians involved in this study.*

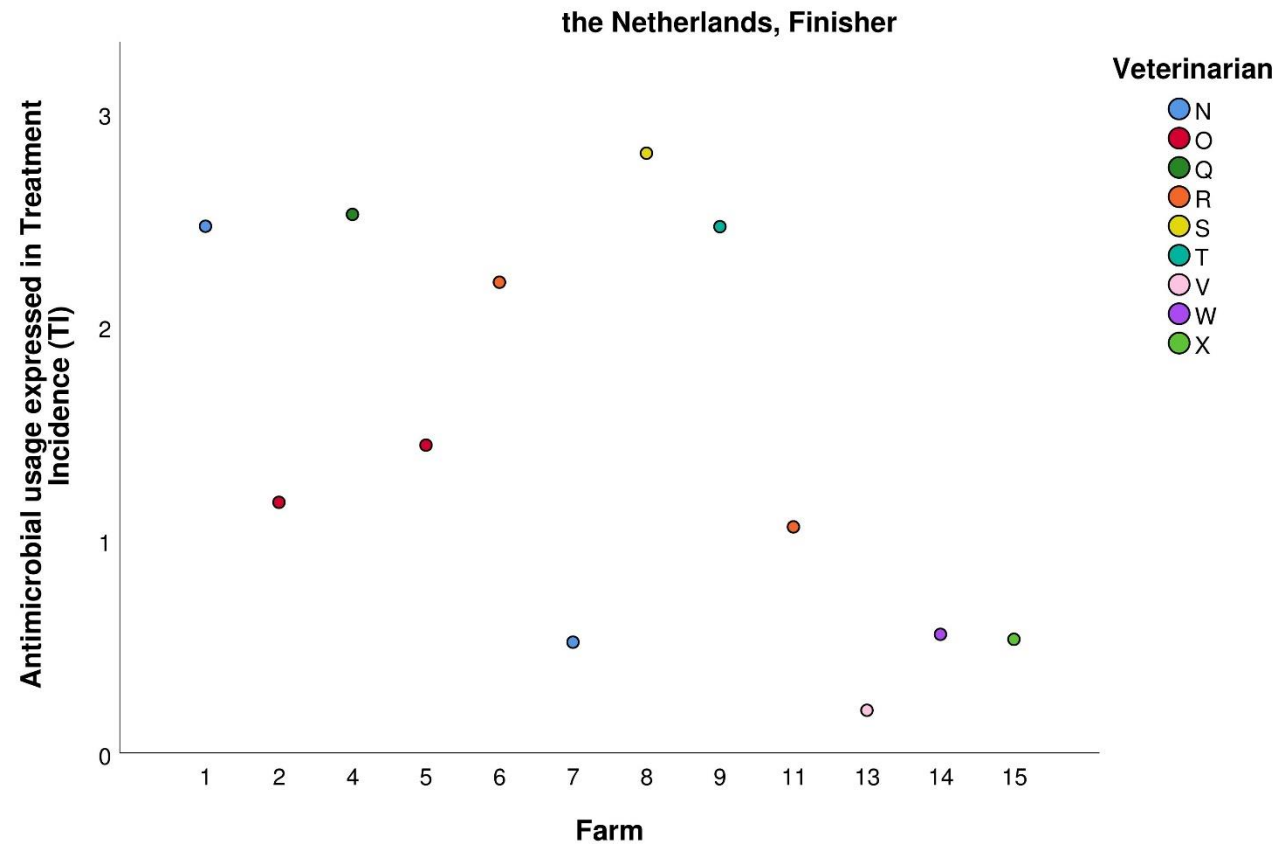

Supplementary Figure 8 Antimicrobial use of each participating pig farm in the Netherlands ( $n=15$ ) for the animal category of the finishers. Antimicrobial use is expressed in Treatment Incidence (TI) on 100 days, the number of days an animal was treated with antimicrobials out of 100 days. The different colors represent the different veterinarians involved in this study. Farms 3, 10 and 12 had no finishers.
